# Supplementary material
Source: Royal Society of Chemistry journal article supplement (doi:10.1039/d6cp00574h)
Supplement: d6cp00574h1.pdf [file d6cp00574h1.pdf]

## Supplementary Information

### **A theoretical study for the performance evaluation of two-dimensional Carbon Kagome Lattice as an anode material for lithium-ion batteries**

Haoxuan Chen<sup>†a</sup>, Zhenjie Zhao<sup>†a</sup>, Zihao Wang<sup>a</sup>, Huadong Zeng<sup>\*a</sup>, Xinlu Cheng<sup>\*b</sup>

<sup>a</sup>*School of Materials and New Energy, South China Normal University, Shanwei 516625, China*

<sup>b</sup>Institute of Atomic and Molecular Physics, Sichuan University, Chengdu 610065, China

## AIMD simulation

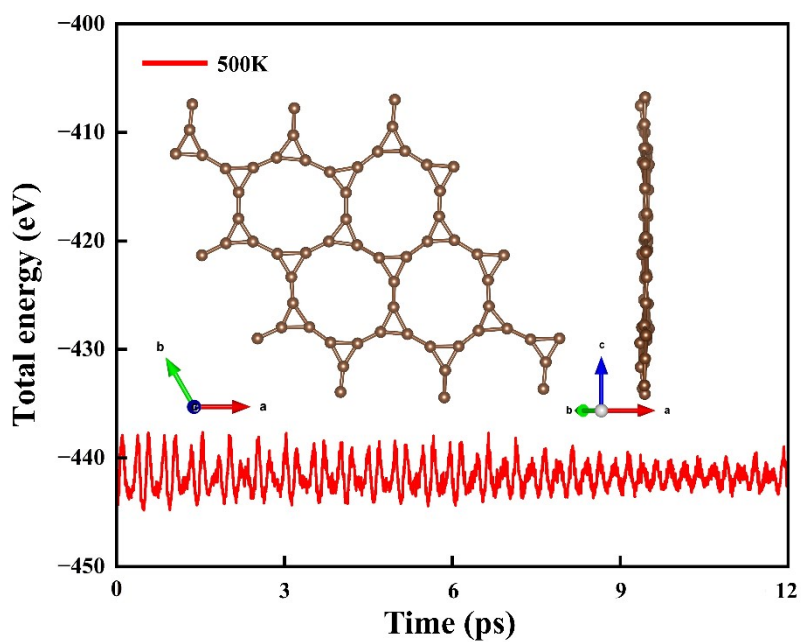

**Fig. S1** Evolution of the total energy and final snapshot of CKL during an AIMD simulation at 500 K for 12 ps.

## Projected crystal orbital Hamilton population (pCOHP)

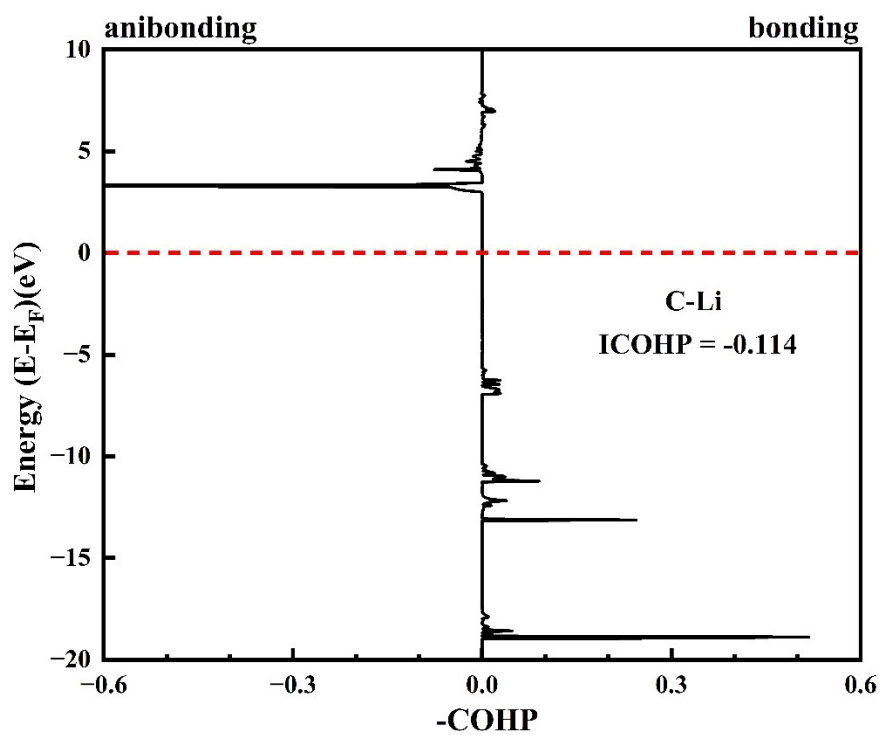

**Fig. S2** -pCOHP curves of Li-C interactions at H1 site.
